# Supplementary material for: Impact of neutral and anion anchoring groups on the photovoltaic performance of triphenylamine sensitizers for dye-sensitized solar cells
Source: Royal Society of Chemistry journal article supplement (doi:10.1039/c6ra00636a), 2016-01-01
Supplement: c6ra00636a1.pdf [file c6ra00636a1.pdf]

# **Impact of Neutral and Anion Anchoring Groups on the Photovoltaic Performance of Triphenylamine Sensitizers for Dye-Sensitized Solar Cells**

Thogiti Suresh,<sup>1</sup> Ramesh Kumar Chitumalla,<sup>2</sup> Nguyen Thi Hai,<sup>1</sup> Joonkyung Jang,<sup>2</sup> Tae Jin Lee,<sup>1</sup> \* Jae Hong Kim<sup>1</sup>, \*

<sup>1</sup>Department of Chemical Engineering, Yeungnam University, 214-1, Dae-dong, Gyeongsan, Gyeongbuk 712-749, Republic of Korea

<sup>2</sup>Department of Nanoenergy Engineering, Pusan National University, Busan, 609-735, Republic of Korea.

## **Content**

- 1.  $^1\text{H}$  NMR spectrum of neutral and anion TPA3T3A dye.**
- 2. Cyclic voltammogram and schematic energy levels of the neutral and anion TPA3T3A dyes.**

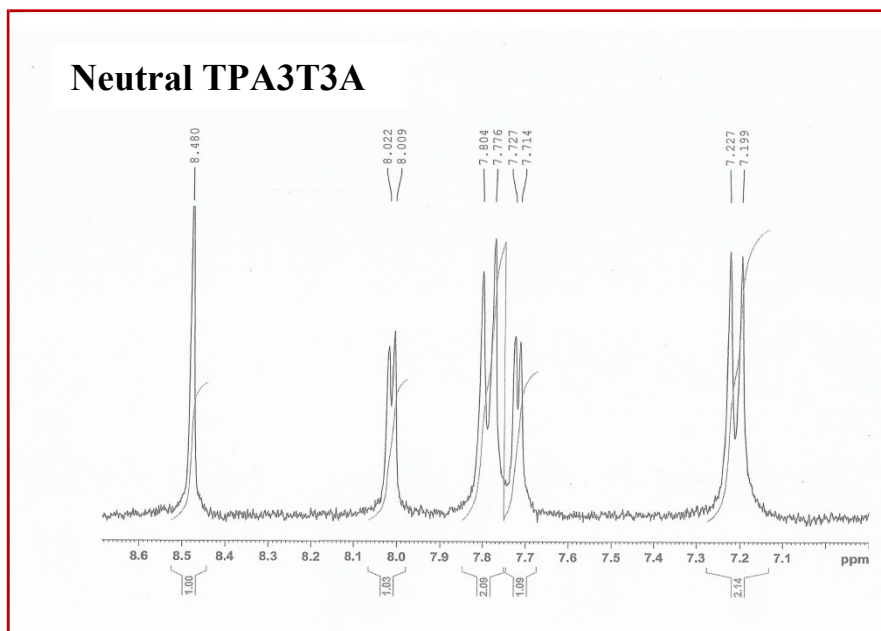

Figure S1: <sup>1</sup>H NMR spectrum of neutral TPA3T3A dye.

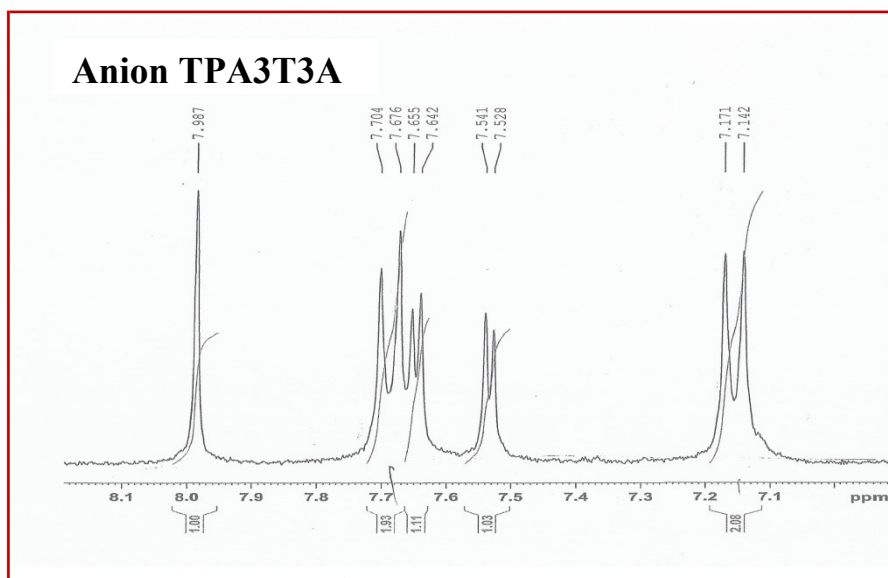

Figure S2:  $^1\text{H}$  NMR spectrum of anion TPA3T3A dye.

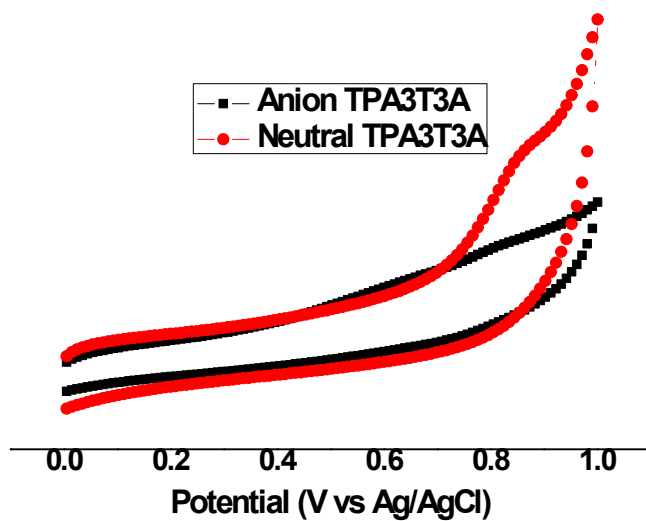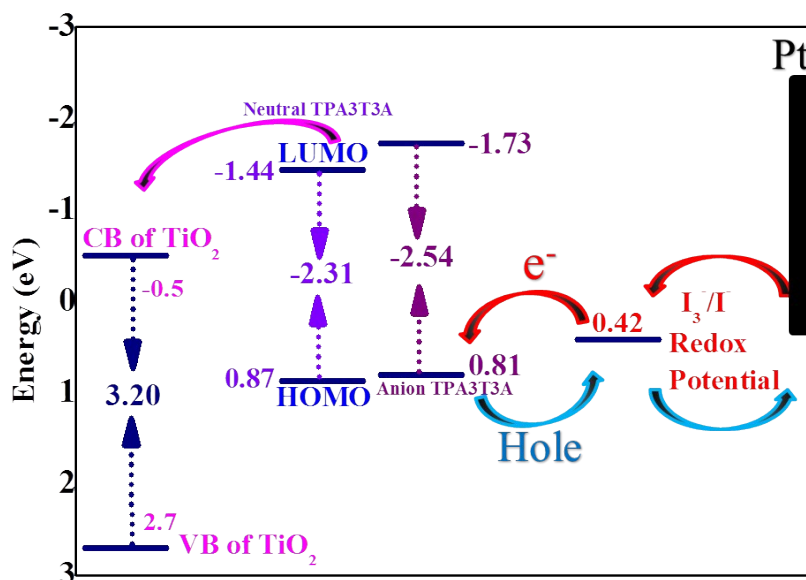

Figure S3: Cyclic voltammogram of neutral and anion dyes (top); and schematic energy levels of the neutral and anion TPA3T3A compared to the TiO<sub>2</sub> conduction band edge and redox potential of the redox couple (bottom).
